# Supplementary material for: High-ampacity conductive polymer microfibers as fast response wearable heaters and electromechanical actuators
Source: Royal Society of Chemistry journal article supplement (doi:10.1039/c5tc03380b), 2016-01-01
Supplement: c5tc03380b1.pdf [file c5tc03380b1.pdf]

## Supporting information

**High-ampacity conductive polymer microfibers as fast response wearable heaters and electromechanical actuators**

Jian Zhou,<sup>\*a</sup> Matthieu Mulle,<sup>a</sup> Yaobin Zhang,<sup>b</sup> Xuezhu Xu,<sup>a</sup> Er Qiang Li,<sup>c</sup> Fei Han,<sup>a</sup> Sigurdur T. Thoroddsen<sup>c</sup> and Gilles Lubineau<sup>\*a</sup>

**This PDF file includes:**

Figure S1. Improving the conductivity of PEDOT/PSS fibers

Figure S2. Temperature sensing by FBGs

Figure S3. TG curves of PEDOT/PSS fibers

Figure S4. SEM images of the fibers

Figure S5. Relation of actuation stress amplitude with cycle number

Table S1. Relative element quantification in the fibers

<sup>a</sup> King Abdullah University of Science and Technology (KAUST), Physical Sciences and Engineering Division, COHMAS Laboratory, Thuwal 23955-6900, Saudi Arabia; E-mail: [jian.zhou@kaust.edu.sa](mailto:jian.zhou@kaust.edu.sa); [gilles.lubineau@kaust.edu.sa](mailto:gilles.lubineau@kaust.edu.sa) Tel: +966(12)8082983;

<sup>b</sup> Shanghai Jiao Tong University, School of Mechanical Engineering, State Key Laboratory of Mechanical Systems and Vibration, Shanghai, 200240, P.R.China;

<sup>c</sup> King Abdullah University of Science and Technology (KAUST), Physical Sciences and Engineering Division, High-Speed Fluids Imaging Laboratory, Thuwal 23955-6900, Saudi Arabia.

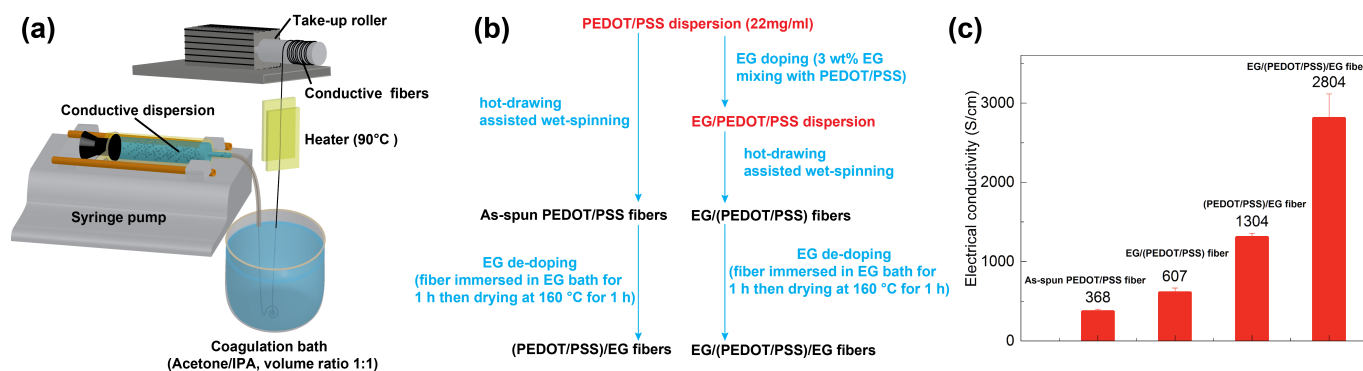

**Fig. S1** Improving the conductivity of PEDOT/PSS fibers. (a) A schematic of the wet-spinning set-up with the vertical hot-drawing apparatus used in this study. The draw ratio was controlled to 3:1. (b) A schematic of strategies to improve the conductivity of PEDOT/PSS fibers. (c) Average electrical conductivity of different PEDOT/PSS fibers by using the strategies in (b).

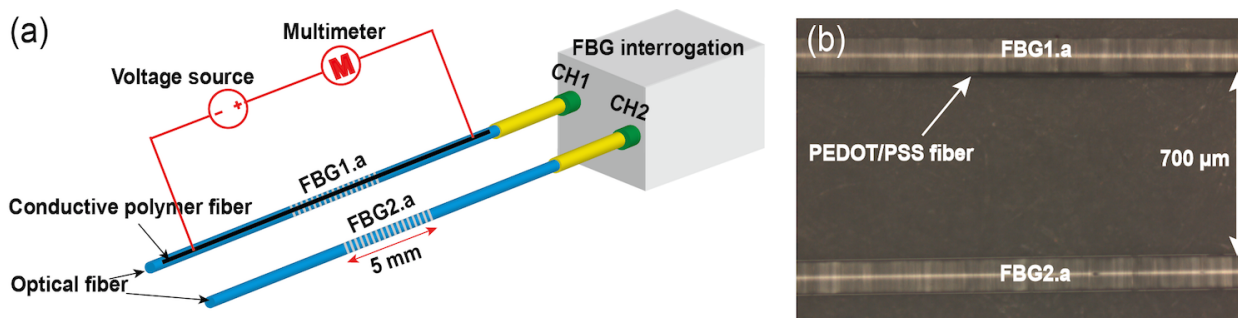

**Fig. S2** Temperature sensing by FBGs. (a) Experimental setup for the temperature measurement of the polymer fiber using FBGs. (b) Optical image shows the position of optical fibers and the PEDOT/PSS fiber during the temperature measurement. The distance between two FBGs is 700 μm.

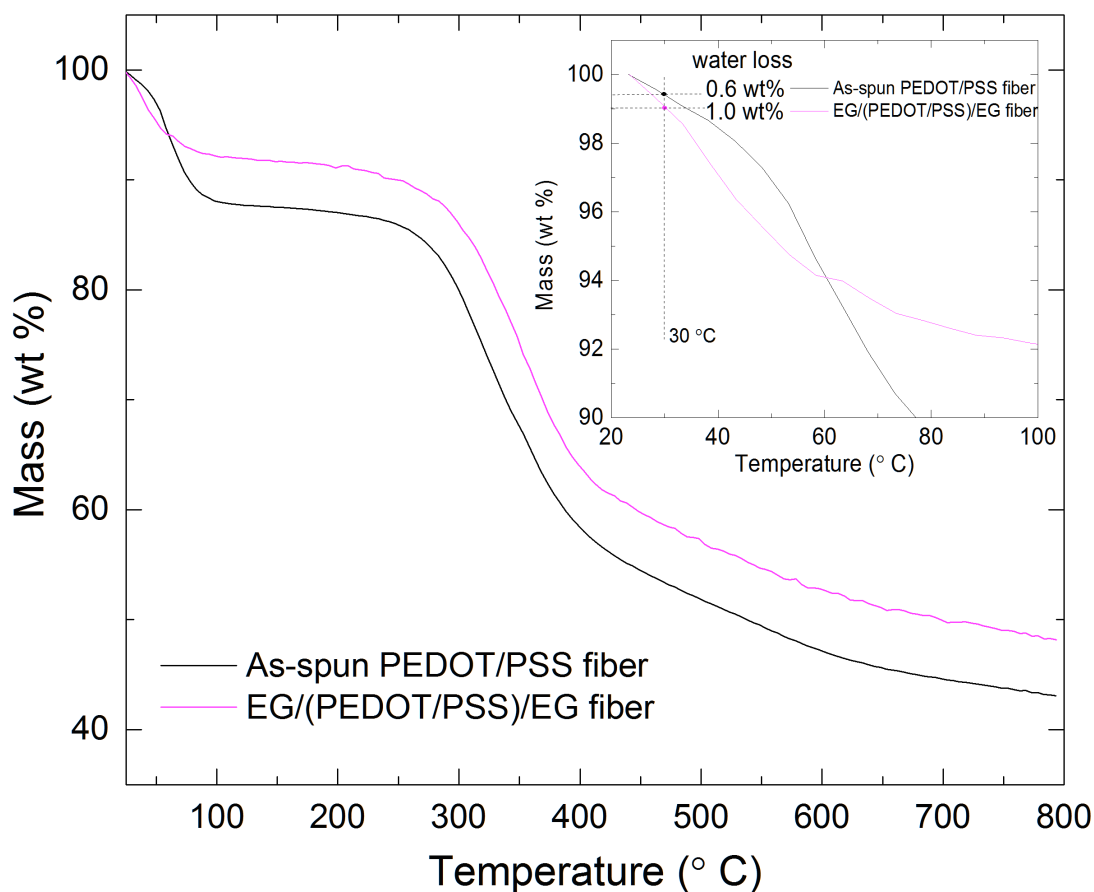

**Fig. S3** TG curves of the as-spun PEDOT/PSS fiber and the EG/(PEDOT/PSS)/EG fiber. Inset is the TG curve from 20 to 100 °C.

Figure S3 shows that the first stage of weight loss up to 200 °C is from the loss of water. The decomposition of PSS starts from 265 °C ends at 320 °C with a weight loss of 25 wt%. This is due to the decomposition of PSS as the sulfonate groups disassociate from styrene.<sup>1</sup> This decomposition is followed by another decomposition of PEDOT in the range between 350 and 600 °C with a weight loss of 10 wt%, which is due to the rupture of the polymer back bone.<sup>1,2</sup> It is worth noting that the residual is over 40 % around 800 °C.

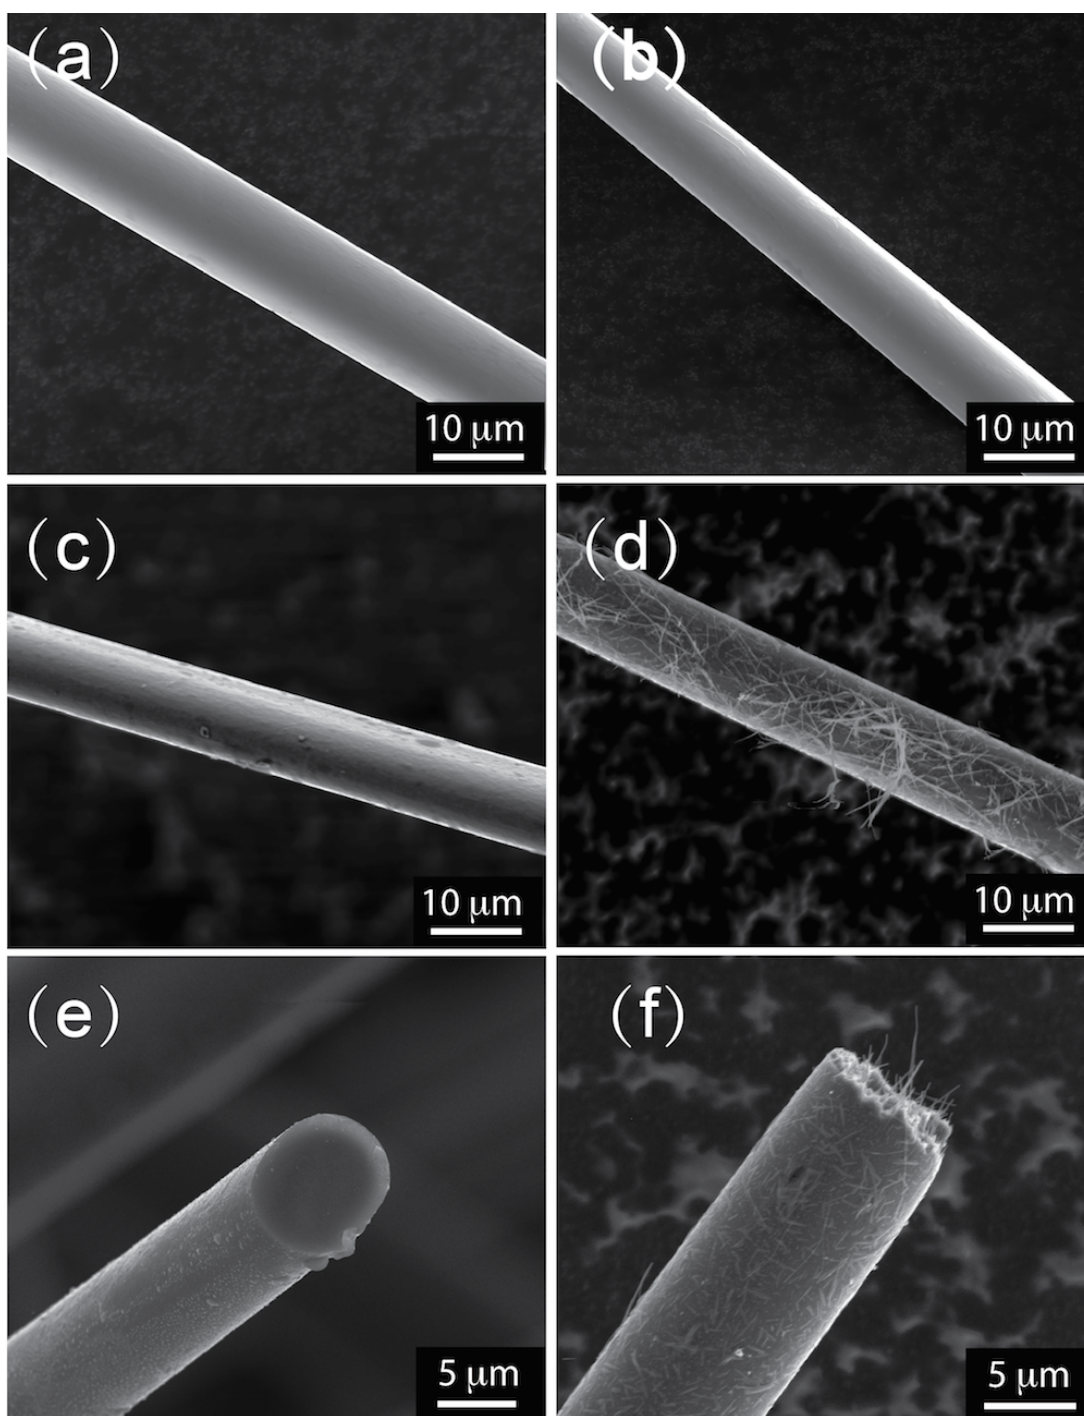

**Fig. S4** SEM images of the conductive polymer microfibers before and after TG analysis (25 to 800 °C) in  $N_2$ . (a) As-spun PEDOT/PSS fiber, (b) EG/(PEDOT/PSS)/EG fiber, (c) As-spun PEDOT/PSS fiber after TG, (d) EG/(PEDOT/PSS)/EG fiber after TG. (e) and (f) cross section images of the as-spun PEDOT/PSS fiber and the EG/(PEDOT/PSS)/EG fiber after TG.

**Table S1** Relative element quantification in the fibers by the energy dispersive x-ray spectroscopy (EDS).

| Sample                         | Element atomic ratio (At %) |       |       |       |
|--------------------------------|-----------------------------|-------|-------|-------|
|                                | C                           | O     | S     | Na    |
| As-spun PEDOT/PSS fibers       | 75.67                       | 12.67 | 11.02 | 0.64  |
| EG/(PEDOT/PSS)/EG fibers       | 76.19                       | 13.88 | 9.14  | 0.79  |
| As-spun PEDOT/PSS fibers-800°C | 89.70                       | 6.61  | 2.43  | 1.27  |
| EG/(PEDOT/PSS)/EG fibers-800°C | 88.48                       | 7.02  | 2.41  | 2.10% |

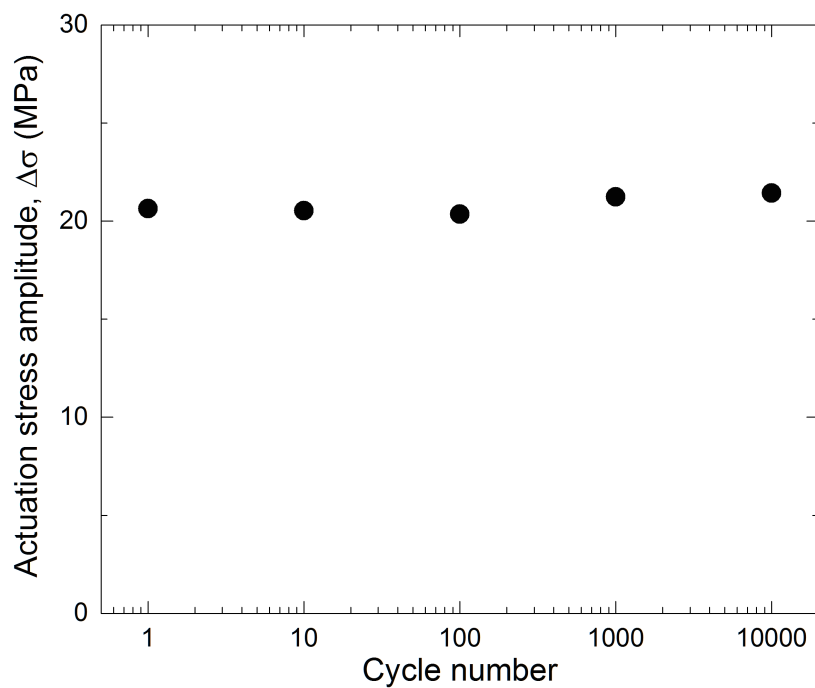

**Fig. S5** Actuation stress amplitude of the EG/(PEDOT/PSS)/EG fiber under the applied 1 Hz square wave voltage (0-5V) at different cycle numbers (1, 10, 100, 1000 and 10000).

---

## References

- 1 D. Antiohos, G. Folkes, P. Sherrell, S. Ashraf, G. Wallace, P. Aitchison, A. Harris, J. Chen and A. Minett, *J Mater Chem*, 2011, **21**, 15987–15994.
- 2 J. Zhou, I. Ventura and G. Lubineau, *Ind Eng Chem Res*, 2014, **53**, 3539–3549.
